# Supplementary material for: Human plasma-like medium improves T lymphocyte activation
Source: bioRxiv or medRxiv preprint supplement (doi:10.1101/740845), 2019-08-21
Supplement: Supplementary file [file media-1.pdf]

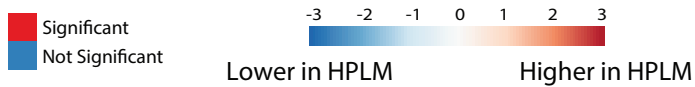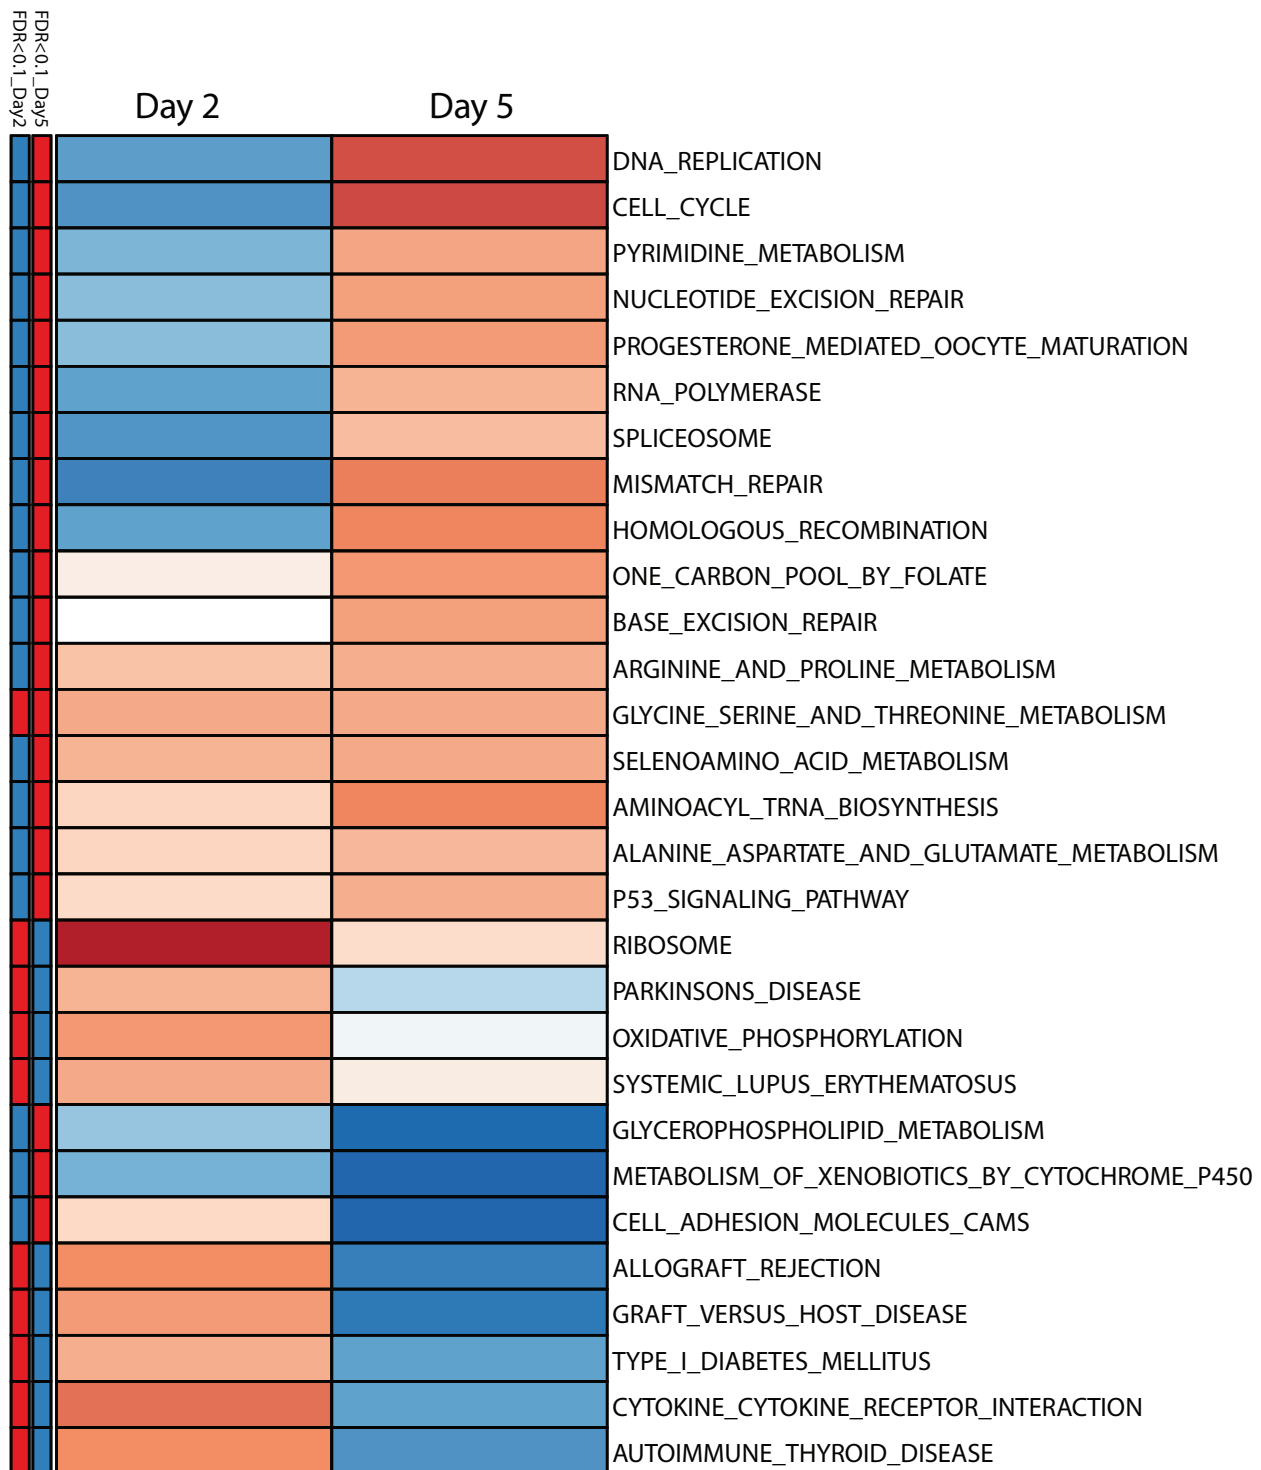

Supplemental Figure 1
