# Supplementary material for: Human plasma-like medium improves T lymphocyte activation
Source: bioRxiv or medRxiv preprint supplement (doi:10.1101/740845), 2019-08-21
Supplement: Supplementary file [file media-2.pdf]

**Supplemental Table 1: Detailed Media Composition**

|                                            | <b>Concentration (<math>\mu\text{M}</math>)</b> |                 |             |
|--------------------------------------------|-------------------------------------------------|-----------------|-------------|
|                                            | <b>RPMI</b>                                     | <b>HPLM-MIN</b> | <b>HPLM</b> |
| <b>Glucose</b>                             | 11111                                           | 5000            | 5000        |
| <b><i>Proteinogenic Amino acids</i></b>    |                                                 |                 |             |
| <b>Alanine</b>                             | 0                                               | 430             | 430         |
| <b>Arginine</b>                            | 1149                                            | 110             | 110         |
| <b>Asparagine</b>                          | 378                                             | 50              | 50          |
| <b>Aspartate</b>                           | 150                                             | 20              | 20          |
| <b>Cysteine</b>                            | 0                                               | 40              | 40          |
| <b>Cystine</b>                             | 208                                             | 100             | 100         |
| <b>Glutamate</b>                           | 136                                             | 80              | 80          |
| <b>Glutamine</b>                           | 2055                                            | 550             | 550         |
| <b>Glycine</b>                             | 133                                             | 300             | 300         |
| <b>Histidine</b>                           | 97                                              | 110             | 110         |
| <b>Hydroxyproline</b>                      | 153                                             | 0               | 0           |
| <b>Isoleucine</b>                          | 382                                             | 70              | 70          |
| <b>Leucine</b>                             | 382                                             | 160             | 160         |
| <b>Lysine</b>                              | 219                                             | 200             | 200         |
| <b>Methionine</b>                          | 101                                             | 30              | 30          |
| <b>Phenylalanine</b>                       | 91                                              | 80              | 80          |
| <b>Proline</b>                             | 174                                             | 200             | 200         |
| <b>Serine</b>                              | 286                                             | 150             | 150         |
| <b>Threonine</b>                           | 168                                             | 140             | 140         |
| <b>Tryptophan</b>                          | 25                                              | 60              | 60          |
| <b>Tyrosine</b>                            | 11                                              | 80              | 80          |
| <b>Valine</b>                              | 171                                             | 220             | 220         |
| <b><i>Ions</i></b>                         |                                                 |                 |             |
| <b>Na<sup>+</sup></b>                      | 138525                                          | 132271          | 132271      |
| <b>K<sup>+</sup></b>                       | 5333                                            | 4142            | 4142        |
| <b>Ca<sup>2+</sup></b>                     | 424                                             | 2390            | 2390        |
| <b>Mg<sup>2+</sup></b>                     | 407                                             | 830             | 830         |
| <b>NH<sup>4+</sup></b>                     | 0                                               | 40              | 40          |
| <b>Cl<sup>-</sup></b>                      | 108781                                          | 116196          | 116196      |
| <b>HCO<sup>3-</sup></b>                    | 23809                                           | 24000           | 24000       |
| <b>PO<sub>4</sub><sup>3-</sup></b>         | 5634                                            | 966             | 966         |
| <b>SO<sub>4</sub><sup>2-</sup></b>         | 407                                             | 350             | 350         |
| <b>NO<sup>3-</sup></b>                     | 848                                             | 80              | 80          |
| <b><i>Additional Polar Metabolites</i></b> |                                                 |                 |             |
| <b>2-hydroxybutyrate</b>                   |                                                 |                 | 50          |

|                                          |  |  |      |
|------------------------------------------|--|--|------|
| <b>3-hydroxybutyrate</b>                 |  |  | 50   |
| <b>4-hydroxyproline</b>                  |  |  | 20   |
| <b>Acetate</b>                           |  |  | 40   |
| <b>Acetone</b>                           |  |  | 60   |
| <b>Acetylcarnitine</b>                   |  |  | 5    |
| <b>Acetylglycine</b>                     |  |  | 90   |
| <b><math>\alpha</math>-aminobutyrate</b> |  |  | 20   |
| <b><math>\alpha</math>-ketoglutarate</b> |  |  | 5    |
| <b>Betaine</b>                           |  |  | 70   |
| <b>Carnitine</b>                         |  |  | 40   |
| <b>Citrate</b>                           |  |  | 130  |
| <b>Citrulline</b>                        |  |  | 40   |
| <b>Creatine</b>                          |  |  | 40   |
| <b>Creatinine</b>                        |  |  | 75   |
| <b>Formate</b>                           |  |  | 50   |
| <b>Fructose</b>                          |  |  | 40   |
| <b>Galactose</b>                         |  |  | 60   |
| <b>Glutathione</b>                       |  |  | 25   |
| <b>Glycerol</b>                          |  |  | 120  |
| <b>Hypoxanthine</b>                      |  |  | 10   |
| <b>Lactate</b>                           |  |  | 1600 |
| <b>Malate</b>                            |  |  | 5    |
| <b>Malonate</b>                          |  |  | 10   |
| <b>Ornithine</b>                         |  |  | 70   |
| <b>Pyruvate</b>                          |  |  | 50   |
| <b>Succinate</b>                         |  |  | 20   |
| <b>Taurine</b>                           |  |  | 90   |
| <b>Urea</b>                              |  |  | 5000 |
| <b>Uric Acid</b>                         |  |  | 350  |
| <b>Uridine</b>                           |  |  | 3    |
